# Supplementary material
Source: Springer Nature journal article supplement (https://www.springermedizin.de/resource/supplementary/12885_2014_4958_MOESM2_ESM.pdf/9467802)

**(a)**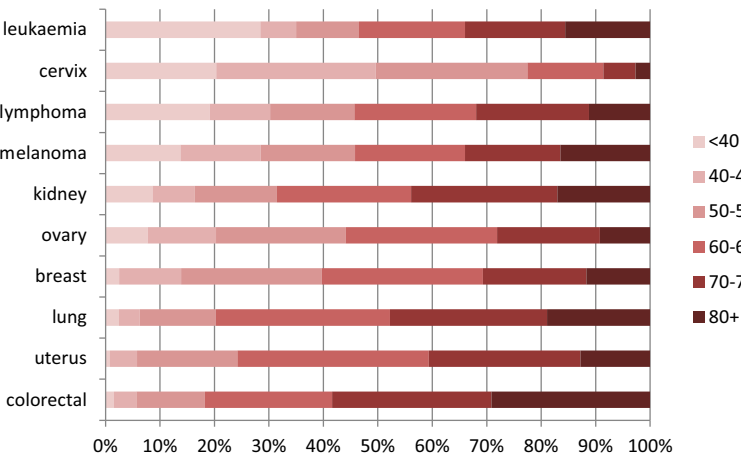**(b)**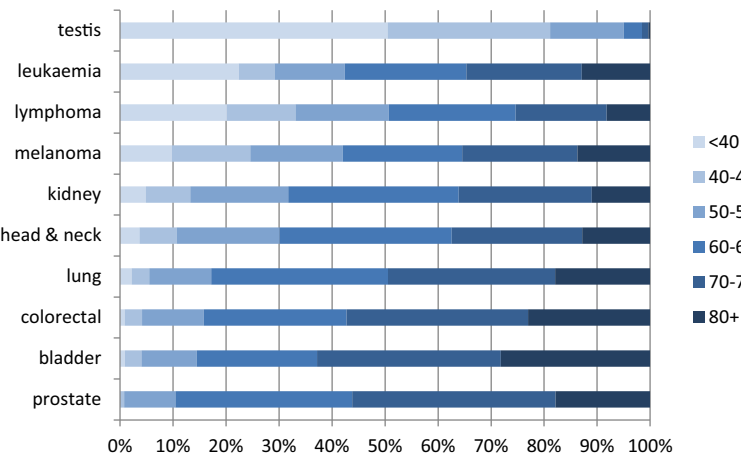

Supplement: MOESM2 [file 9467802]
